# Supplementary material for: High-resolution computational models of genome binding events
Source: Springer Nature journal article supplement (doi:10.1038/nbt1233), 2006-08-01
Supplement: nbt1233-S2.pdf [file nbt1233-S2.pdf]

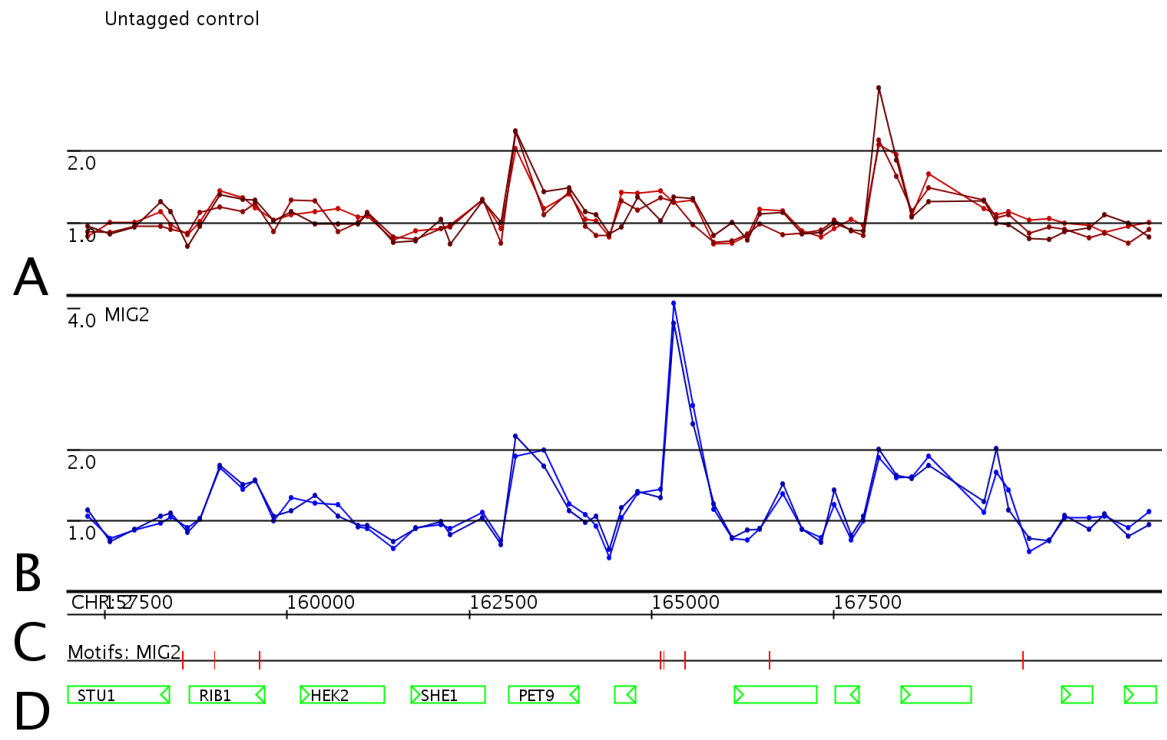

Figure 2: Enrichment ratios for three replicates of an untagged control experiment (track A) and two replicates of MIG2 (track B). Subtracting the untagged control signal from MIG2 and other experiments removes the signal from non-specific binding (left and right peaks) without diminishing the signal from a potential binding event (center peak) found over MIG2 motif sites (track C).
