# Supplementary material for: High-resolution computational models of genome binding events
Source: Springer Nature journal article supplement (doi:10.1038/nbt1233), 2006-08-01
Supplement: nbt1233-S5.pdf [file nbt1233-S5.pdf]

| p-value     | number found | category                                                                       |
|-------------|--------------|--------------------------------------------------------------------------------|
| 9.26464E-10 | 018 / 243    | (01.01 amino acid metabolism)                                                  |
| 1.02291E-07 | 009 / 065    | (01.01.06 metabolism of the aspartate family)                                  |
| 1.03808E-07 | 008 / 047    | (01.01.03 assimilation of ammonia,metabolism of the glutamate group)           |
| 1.65838E-07 | 006 / 021    | (01.01.03.05 metabolism of arginine)                                           |
| 3.02534E-07 | 010 / 096    | (01.02 nitrogen and sulfur metabolism)                                         |
| 3.52644E-07 | 005 / 013    | (01.01.03.05.01 biosynthesis of arginine)                                      |
| 3.87176E-05 | 003 / 006    | (01.01.05.03 metabolism of urea (urea cycle))                                  |
| 3.88747E-05 | 005 / 031    | (01.02.04 regulation of nitrogen and sulphur utilization)                      |
| 8.12094E-05 | 035 / 1,500  | (01 METABOLISM)                                                                |
| 1.58169E-04 | 003 / 009    | (01.01.06.06.01.03 aminoadipic acid pathway)                                   |
| 2.23879E-04 | 003 / 010    | (01.01.06.06.01 biosynthesis of lysine)                                        |
| 2.23879E-04 | 003 / 010    | (01.20.17.01 biosynthesis of nonprotein amino acids)                           |
| 6.54517E-04 | 003 / 014    | (01.01.05 metabolism of urea cycle, creatine and polyamines)                   |
| 9.35702E-04 | 005 / 060    | (01.02.01 nitrogen and sulfur utilization)                                     |
| 9.44648E-04 | 002 / 004    | (01.01.06.02.01 biosynthesis of asparagine)                                    |
| 9.88583E-04 | 003 / 016    | (01.01.06.06 metabolism of lysine)                                             |
| 1.66408E-03 | 003 / 019    | (01.20.17 biosynthesis of secondary products derived from primary amino acids) |
| 2.85936E-03 | 005 / 077    | (01.20 secondary metabolism)                                                   |
| 5.4377E-03  | 002 / 009    | (01.01.06.01 metabolism of aspartate)                                          |
| 5.4377E-03  | 002 / 009    | (01.01.06.02 metabolism of asparagine)                                         |
| 8.24319E-03 | 003 / 033    | (01.01.13 regulation of amino acid metabolism)                                 |
| 8.95892E-03 | 003 / 034    | (01.01.06.05 metabolism of methionine)                                         |

Table 1: MIPS categories of Gcn4 targets identified by JBD. The “number found” for each category indicates the number of genes in that category that were bound and the total size of the category. As we expected, the most significant categories involve amino acid synthesis and metabolism.
