# Supplementary material for: High-resolution computational models of genome binding events
Source: Springer Nature journal article supplement (doi:10.1038/nbt1233), 2006-08-01
Supplement: nbt1233-S6.pdf [file nbt1233-S6.pdf]

| Gcn4 from Harbison <i>et al.</i> |        |        |        |        |        |        |        |
|----------------------------------|--------|--------|--------|--------|--------|--------|--------|
|                                  | 0      | 1      | 2      | 3      | 4      | 5      | 6      |
| A                                | -2.448 | -3.176 | 1.515  | -3.466 | -2.887 | -1.689 | 1.103  |
| C                                | -3.359 | -3.029 | -4.535 | 1.914  | -2.678 | 2.236  | -2.025 |
| T                                | 1.485  | -2.083 | -2.591 | -2.491 | 1.489  | -2.924 | -0.597 |
| G                                | -3.516 | 2.302  | -3.906 | 0.516  | -3.269 | -2.588 | -1.949 |

| Gcn4 from JBD |        |        |        |        |        |        |        |        |
|---------------|--------|--------|--------|--------|--------|--------|--------|--------|
|               | 0      | 1      | 2      | 3      | 4      | 5      | 6      | 7      |
| A             | 1.087  | -9.725 | -9.830 | 1.554  | -9.766 | -9.756 | -0.687 | 1.292  |
| C             | -8.141 | -9.676 | -9.768 | -9.828 | 1.997  | -3.086 | 2.164  | -1.672 |
| T             | -9.752 | 1.610  | -9.629 | -9.809 | -9.802 | 1.580  | -9.825 | -1.509 |
| G             | 0.814  | -9.664 | 2.532  | -2.171 | 0.843  | -8.512 | -2.953 | -2.562 |

| Mig2 from Luftiyya <i>et al.</i> |        |        |        |        |        |        |        |        |        |        |
|----------------------------------|--------|--------|--------|--------|--------|--------|--------|--------|--------|--------|
|                                  | 0      | 1      | 2      | 3      | 4      | 5      | 6      | 7      | 8      | 9      |
| A                                | 1.167  | -2.688 | -4.579 | -4.579 | -4.579 | -4.969 | -3.242 | -4.969 | 0.713  | 0.693  |
| C                                | -2.195 | -1.901 | -2.589 | 2.249  | -4.011 | -4.262 | -4.011 | -2.262 | -1.228 | -1.379 |
| T                                | -1.750 | 1.404  | -4.579 | -2.560 | -3.242 | -4.969 | -3.761 | -3.384 | -1.234 | -1.311 |
| G                                | -0.159 | -1.237 | 2.310  | -2.589 | 2.310  | 2.352  | 2.295  | 2.277  | 0.555  | 0.663  |

| Mig2 from JBD |        |        |        |        |        |        |        |        |        |        |
|---------------|--------|--------|--------|--------|--------|--------|--------|--------|--------|--------|
|               | 0      | 1      | 2      | 3      | 4      | 5      | 6      | 7      | 8      | 9      |
| A             | 1.610  | -0.356 | -9.631 | -9.736 | -1.377 | -9.831 | -9.755 | -0.386 | -9.329 | -1.373 |
| C             | -9.289 | -9.645 | -0.453 | 2.118  | -9.389 | -0.458 | -9.754 | -9.737 | -9.327 | -9.487 |
| T             | -9.288 | -0.389 | -9.631 | -0.389 | 0.609  | -9.842 | -1.338 | -9.737 | -9.324 | 1.416  |
| G             | -9.230 | 1.517  | 2.338  | -9.735 | 1.117  | 2.339  | 2.333  | 2.117  | 2.532  | -9.486 |

Table 2: Known Gcn4 and Mig2 log-odds weight matrix as discovered by motif discovery with positional priors from JBD and as previously published by Harbison *et al.* and Luftiyya *et al.*.
