# Supplementary material for: High-resolution computational models of genome binding events
Source: Springer Nature journal article supplement (doi:10.1038/nbt1233), 2006-08-01
Supplement: nbt1233-S8.pdf [file nbt1233-S8.pdf]

| (A) Decoupled binding events and 3 replicates |                      |     |     |     |     | (B) Decoupled binding events and GCN4 influence function |                      |     |     |     |     |     |     |     |
|-----------------------------------------------|----------------------|-----|-----|-----|-----|----------------------------------------------------------|----------------------|-----|-----|-----|-----|-----|-----|-----|
| microarray<br>res.(bp)                        | Mean fragment length |     |     |     |     | microarray<br>res. (bp)                                  | Number of replicates |     |     |     |     |     |     |     |
|                                               | 179                  | 216 | 327 | 490 | 654 |                                                          | 1                    | 2   | 3   | 4   | 5   | 6   | 8   | 10  |
| 50                                            | 0.4                  | 0.4 | 0.5 | 0.4 | 0.4 | 50                                                       | 0.5                  | 1.5 | 0.5 | 0.3 | 0.5 | 1.0 | 1.4 | 1.3 |
| 100                                           | 0.5                  | 0.5 | 0.4 | 0.4 | 0.5 | 100                                                      | 0.6                  | 0.5 | 0.4 | 0.4 | 0.4 | 0.3 | 0.3 | 0.4 |
| 150                                           | 0.5                  | 0.5 | 0.5 | 0.5 | 0.5 | 150                                                      | 0.9                  | 0.5 | 0.5 | 0.4 | 0.4 | 0.4 | 0.3 | 0.3 |
| 200                                           | 0.6                  | 0.5 | 0.5 | 0.5 | 0.5 | 200                                                      | 1.3                  | 0.7 | 0.5 | 0.5 | 0.4 | 0.4 | 0.3 | 0.4 |
| 250                                           | 0.9                  | 0.7 | 0.8 | 0.6 | 0.8 | 250                                                      | 1.4                  | 1.0 | 0.8 | 0.6 | 0.5 | 0.5 | 0.4 | 0.4 |
| 300                                           | 1.1                  | 0.9 | 0.9 | 0.9 | 2.2 | 300                                                      | 7.8                  | 1.0 | 0.9 | 0.6 | 0.6 | 0.6 | 0.5 | 0.4 |
| 350                                           | 1.7                  | 1.3 | 1.2 | 1.2 | 1.5 | 350                                                      | 22.6                 | 1.4 | 1.2 | 0.8 | 0.8 | 0.8 | 0.8 | 0.5 |

  

| (C) Coupled binding events and 3 replicates |                      |     |     |     |     | (D) Coupled binding events and GCN4 influence function |                      |     |     |     |     |     |     |     |
|---------------------------------------------|----------------------|-----|-----|-----|-----|--------------------------------------------------------|----------------------|-----|-----|-----|-----|-----|-----|-----|
| microarray<br>res. (bp)                     | Mean fragment length |     |     |     |     | microarray<br>res. (bp)                                | Number of replicates |     |     |     |     |     |     |     |
|                                             | 179                  | 216 | 327 | 490 | 654 |                                                        | 1                    | 2   | 3   | 4   | 5   | 6   | 8   | 10  |
| 50                                          | 0.4                  | 0.4 | 0.4 | 0.9 | 0.7 | 50                                                     | 0.6                  | 2.8 | 0.4 | 0.4 | 0.4 | 0.8 | 1.3 | 1.1 |
| 100                                         | 0.5                  | 0.5 | 0.5 | 0.6 | 0.6 | 100                                                    | 1.2                  | 0.6 | 0.5 | 0.4 | 0.5 | 0.4 | 0.4 | 1.0 |
| 150                                         | 0.5                  | 0.5 | 0.6 | 0.8 | 0.6 | 150                                                    | 1.6                  | 0.8 | 0.6 | 0.5 | 0.4 | 0.5 | 0.4 | 0.4 |
| 200                                         | 0.6                  | 0.6 | 0.8 | 1.0 | 1.0 | 200                                                    | 2.7                  | 1.3 | 0.8 | 0.6 | 0.6 | 0.6 | 0.5 | 0.5 |
| 250                                         | 1.5                  | 1.2 | 1.1 | 2.0 | 1.6 | 250                                                    | 2.1                  | 1.2 | 1.1 | 0.8 | 0.6 | 0.6 | 0.5 | 0.5 |
| 300                                         | 3.2                  | 2.4 | 1.8 | 1.7 | 2.3 | 300                                                    | 7.6                  | 2.1 | 1.8 | 1.7 | 1.5 | 1.4 | 1.0 | 0.8 |
| 350                                         | 3.4                  | 3.4 | 2.9 | 2.8 | 3.4 | 350                                                    | 16.3                 | 2.8 | 2.9 | 2.8 | 3.2 | 3.1 | 2.5 | 2.4 |

Table 4: Standard error of the mean spatial resolution of JBD on synthetic data (the median of the spatial resolution is reported in Table 3 of the main text.).
